# Supplementary material
Source: PubMed Central journal article supplement (PMC6091668)
Supplement: NIHMS805548-supplement.pdf [file NIHMS805548-supplement.pdf]

**Supplemental Information for:**

**Natural STING agonist as an "ideal" adjuvant for cutaneous vaccination**

Ji Wang<sup>1</sup>, Peiyu Li<sup>1,3</sup> and Mei X. Wu<sup>1,2\*</sup>

<sup>1</sup> Wellman Center for Photomedicine, Massachusetts General Hospital, Department of Dermatology, Harvard Medical School, Boston, Massachusetts, 02114, United States;

<sup>2</sup> Harvard-MIT Division of Health Sciences and Technology, Cambridge, Massachusetts 02142, United States

<sup>3</sup> Key Laboratory of Medical Molecular Virology of Ministries of Education and Health, School of Basic Medical Sciences and Shanghai Public Health Clinical Center, Fudan University, Shanghai, 200032, China

\* Address Correspondence to: Dr. Mei X. Wu, Wellman Center for Photomedicine, Massachusetts General Hospital, 50 Blossom Street, Edwards 222, Boston, MA 02114, TEL: 617-726-1298; FAX: 617-726-1206; E-mail: [mwu5@mg.harvard.edu](mailto:mwu5@mg.harvard.edu)

## **Supplemental Material and Methods**

### **Animals**

Female outbred Swiss Webster mice and C57BL/6J and IFNAR<sup>-/-</sup> mice (Muller et al, 1994) were purchased from Charles River Laboratories and Jackson Laboratories, respectively. MHC II-GFP mice expressing MHC class II molecule infused into enhanced green fluorescent protein (GFP) and STING<sup>-/-</sup> mice were kindly gifts of Dr. Hidde Ploegh, Massachusetts Institute of Technology and Dr. Glen Barber, University of Miami (Boes et al, 2002, Ishikawa et al, 2009). MHC II-GFP STING<sup>-/-</sup> mice were generated by breeding MHC II-GFP mice with STING<sup>-/-</sup> mice. Male Yorkshire pigs at 4 months of age were obtained from the Teaching and Research Resources at Tufts University. The animals were housed in the pathogen-free animal facilities of Massachusetts General Hospital (MGH) in compliance with institutional, hospital, and NIH guidelines. All studies were reviewed and approved by the MGH Institutional Animal Care and Use Committee.

### **Influenza viruses and vaccines**

Pandemic A/California/7/2009 H1N1 influenza virus was obtained from American Type Culture Collection (ATCC, #FR-201). The reassortant H5N1 virus (SJR-161052) was obtained from Dr. Richard Webby, St. Jude Children's Research Hospital, which is comprised of HA and NA genes from A/Vietnam/1203/2004 H5N1 but other genes from model A/Puerto Rico/8/1934 H1N1 virus. To further detoxify the virus, the stretch of six basic amino acids at the cleavage site between HA1 and HA2 were replaced with an avirulent avian sequence. The resulting virus was antigenically identical to the wild-type A/Vietnam/1203/2004 virus, but was apathogenic in chickens (Treanor et al, 2006). The viruses were expanded in 10-day-old embryonated chicken eggs at 35°C for 3 days, harvested, purified by sucrose gradient ultracentrifugation, and frozen at -80°C until use. To challenge mice, 2009H1N1 virus was adapted in mice for three cycles of intranasal instillation-lung homogenate preparation and their infectivity in mice was assayed by a 50% lethal dose (LD<sub>50</sub>) following a standard protocol (Cottey et al,

2001). Monovalent 2009 H1N1 influenza vaccine (NR-20347, Sanofi Pasteur, Inc.) and monovalent H5N1 pandemic influenza vaccine (NR-4143, Aventis Pasteur, Inc.) were obtained from BEI Resources, NIAID, NIH.

### **Immunizations and challenges**

For ID immunization, the lower dorsal skin of mice was hair removed, into which H1N1 or H5N1 vaccine at 300 ng HA content was ID administered in a total volume of 20  $\mu$ l, either alone or together with 20  $\mu$ g 2'3'-cGAMP, cdGMP or 3'3'-cGAMP (all from Invivogen). The same amount of vaccines was prepared in 50  $\mu$ l PBS, mixed with 50  $\mu$ l PBS, AddaVax (Invivogen) or AddaVax plus 20  $\mu$ g MPL (Sigma), and IM injected for comparison. To compare the adjuvant effect of cGAMP with CpG or MPL, H5N1 vaccine at 300 ng HA content was ID administered with varying doses of cGAMP (2.3, 8.1 or 20  $\mu$ g), 20  $\mu$ g CpG (CpG-ODN 1826, TriLink Biotechnologies) or 20  $\mu$ g MPL. The blood samples were collected via tail vein 7, 14, and 28 days after immunization for evaluating cellular and humoral immune responses.

Additional blood samples were also collected 8 and 40 weeks after immunization to follow up for long term immunity. The immunized and control mice were challenged by intranasal instillation of  $10 \times LD_{50}$  mouse-adapted A/California/7/2009 H1N1 virus in five weeks after immunization. Body weight and survival were monitored daily for 14 days after the infection.

For swine immunization, the animals were anesthetized by IM injection of telazol (2.2 mg kg<sup>-1</sup>)/xylazine (2.2 mg kg<sup>-1</sup>)/atropine (0.04 mg kg<sup>-1</sup>) and maintained under isoflurane (2-3%) inhalation during hair removal and immunization. H5N1 vaccine at 6  $\mu$ g HA content per animal was ID injected into exterior hind leg skin alone or along with 200  $\mu$ g 2'3'-cGAMP. The pigs received a booster immunization similarly on the contralateral leg 14 days after priming immunization. Seasonal influenza vaccine at 6  $\mu$ g HA per animal (2012-2013 formulation, CSL Biotherapies) was ID immunized similarly but only once to compare skin reactions. Blood samples were collected 14 days after priming or 7 days after boosting vaccination, respectively.

### **Hemagglutination inhibition (HAI) assays**

Serum samples were prepared and incubated with receptor-destroying enzyme (RDE) (Denka Seiken) at 37°C for 20 hours followed by inactivation of the enzyme at 56°C for 30 minutes. The resultant serum samples were serially diluted and incubated with 4 hemagglutination units (HAU) of influenza virus (A/California/7/2009 H1N1 or the reassortant H5N1 virus SJRG-161052) at 37°C for 1 hour. Then the mixture was incubated with 0.5% chicken red blood cells (for H1N1) or horse red blood cells (for H5N1) at room temperature for 30 minutes. The HAI titer was defined as the reciprocal of the highest serum dilution that inhibited 4 HAU.

### **The enzyme-linked immunosorbent assay (ELISA)**

Influenza-specific IgG, IgG1, IgG2a, and IgG2c antibody titers were measured by ELISA. In brief, 1 µg/ml recombinant HA was coated onto ELISA plates in NaHCO<sub>3</sub> buffer, pH9.6 overnight. After incubation with serially diluted serum samples, HRP-conjugated goat anti-mouse IgG (NA931V, GE healthcare, dilution 1:6000), IgG1 (1073-05, Southern Biotech, 1:4000), or IgG2a (1083-05, Southern Biotech, 1:4000) antibody was added to measure specific subtypes. Anti-mouse IgG2c (1079-05, Southern Biotech, 1:5000) antibody was used for C57BL/6 mice in place of anti-IgG2a antibody.

### **Cellular immune responses**

Peripheral blood mononuclear cells (PBMCs) were obtained from blood after lysis of red blood cells. PBMCs at 10<sup>6</sup> cells per ml were incubated with inactivated influenza virus (1 µg/ml HA content) and 4 µg/ml anti-CD28 (clone 37.51, BD Pharmingen) antibody overnight. Golgi-Plug (BD Pharmingen, 1:1000) was added to the culture and continuously incubated for another 5 hours. The stimulated cells were surface stained with fluorescence-conjugated antibodies against CD4 (clone RM4-5, Biolegend, dilution 1:100) and CD8 (clone 53-6.7, Biolegend, dilution 1:200), followed by intracellular staining with anti-IFN $\gamma$  (clone XMG1.2, Biolegend, 1:100) and anti-IL4 (11B11, Biolegend, dilution 1:100) antibodies and flow cytometric analysis as previously described (Hong et al, 2010).

### **Histological examination**

Mice were ID injected with PBS, 20 µg cGAMP, 20 µg resiquimod (IMGENEX), 2009 H1N1 influenza vaccine (300 ng HA) or the vaccine plus 20 µg cGAMP. The inoculation sites were photographed on indicated days. The tissue at the inoculation site was dissected 2 days after injection, fixed, and stained by a standard H&E procedure. The slides were scanned and analyzed by NanoZoomer and Digital Pathology software (Hamamatsu).

### **Intravital confocal imaging**

The ears of MHC II-GFP mice or MHC II-GFP STING<sup>-/-</sup> mice were hair removed and injected with 20 µg cGAMP, followed by imaging by intravital two-photon confocal microscopy (Olympus FV-1000) for 12 hours (Chen et al, 2010). The velocity of migrating MHC II<sup>+</sup> cells was analyzed by MTrackJ plugin of Image J software (Meijering et al, 2012).

### **cGAMP distribution analysis**

C57BL/6J mice were injected ID or IM with 20 µg fluorescein conjugated cGAMP (FITC-cGAMP, c[8-Fluo-AET-G(2',5')pA(3',5')p]) from Biolog. The tissue of the injection site and draining lymph nodes were collected in 0, 3, 6, 12 and 24 hours after injection, homogenized, and centrifuged at 18,000 rcf for 15 minutes. The concentration of cGAMP in supernatants was measured by a Fluorescent Microplate Reader (SpectraMax M5).

### **Quantitative real-time RT-PCR**

The skin or muscle was administered with PBS or 20 µg cGAMP. The injection sites were excised in six hours and total RNA was extracted, reverse-transcribed, and amplified by real-time PCR using an SYBR Green PCR kit (Roche). Glyceraldehyde 3-phosphate dehydrogenase (GAPDH) was used as an internal control. The primers used were listed in **Supplementary Table 1**.

### **Bone marrow derived dendritic cell (BMDC) culture and stimulation**

Bone marrow cells were harvested from tibiae and femurs of C57BL/6 mice at 4-6 weeks of age. Cells at a concentration of  $1 \times 10^6$  / ml were cultured with 10 ng/ml Granulocyte Macrophage Colony Stimulating Factor (GM-CSF) for 7 days (Boonstra et al, 2003). BMDCs were sorted from the culture by flow cytometry on the basis of CD11c expression. The sorted BMDCs were cultured for 6 hours with different concentrations of cGAMP ranging from 0.002 to 40  $\mu$ g/ml or with 20  $\mu$ g/ml cGAMP for varying times from 1 to 24 hours. Cytokine and chemokine expressions in BMDCs were quantified by real-time RT-PCR as above.

### **Statistical analysis**

Data are presented as mean  $\pm$  s.e.m. Two-tailed t-test (t-test) was used to analyze a difference between two groups, and one way ANOVA was used among multiple groups. Log-rank test was used to analyze the survival. p value was calculated by PRISM software (GraphPad) and a difference was regarded significant if p value was less than 0.05.

**Supplementary Table 1 Primers for real-time PCR Analysis**

| Gene          | Forward                | Reverse                  |
|---------------|------------------------|--------------------------|
| <i>Gapdh</i>  | atcaagaaggtggtgaagca   | agacaacctggcctcagtgt     |
| <i>Ccl2</i>   | ggctcagccagatgcagttaa  | cctactcattgggatcatcttgct |
| <i>Cxcl9</i>  | ggagttcgaggaaccctagtg  | gggattttagtggatcgtgc     |
| <i>Cxcl10</i> | ccaagtgtgccgtcattttc   | tcctatggcctcatttca       |
| <i>Ifnb1</i>  | agctccaagaaaggacgaaca  | gccctgtaggtgaggtgat      |
| <i>Tnfa</i>   | cctgtagcccacgtcgtag    | gggagtagacaaggtacaacct   |
| <i>Il12</i>   | ctgtgccttggtagcatctatg | gcagagtctcgccattatgattc  |
| <i>Il6</i>    | tagtccttctacccaatttcc  | ttggccttagccactccttc     |
| <i>Ifng</i>   | atgaacgctacacactgcatc  | ccatcctttgcccagttcctc    |
| <i>Il1b</i>   | acatcagcacctcacaagca   | ttagaaacagtccagccata     |
| <i>Tgfb1</i>  | tgacgtcactggagttgtacgg | ggttcatgtcatggatgggtgc   |

## Reference

- Boes M, Cerny J, Massol R, Op dB, Kirchhausen T, Chen J, et al. T-cell engagement of dendritic cells rapidly rearranges MHC class II transport. *Nature* 2002; 418: 983-8.
- Boonstra A, Asselin-Paturel C, Gilliet M, Crain C, Trinchieri G, Liu YJ, et al. Flexibility of mouse classical and plasmacytoid-derived dendritic cells in directing T helper type 1 and 2 cell development: Dependency on antigen dose and differential toll-like receptor ligation. *J Exp Med* 2003; 197: 101-9.
- Chen X, Kim P, Farinelli B, Doukas A, Yun SH, Gelfand JA, et al. A novel laser vaccine adjuvant increases the motility of antigen presenting cells. *PLoS One* 2010; 5: e13776.
- Cottey R, Rowe CA, Bender BS. Influenza virus. *Curr Protoc Immunol* 2001; Chapter 19: Unit 19.11.
- Hong DK, Chang S, Botham CM, Giffon TD, Fairman J, Lewis DB. Cationic lipid/DNA complex-adjuvanted influenza A virus vaccination induces robust cross-protective immunity. *J Virol* 2010; 84: 12691-702.
- Ishikawa H, Ma Z, Barber GN. STING regulates intracellular DNA-mediated, type I interferon-dependent innate immunity. *Nature* 2009; 461: 788-92.
- Meijering E, Dzyubachyk O, Smal I. Methods for cell and particle tracking. *Methods Enzymol* 2012; 504: 183-200.
- Muller U, Steinhoff U, Reis LF, Hemmi S, Pavlovic J, Zinkernagel RM, et al. Functional role of type I and type II interferons in antiviral defense. *Science* 1994; 264: 1918-21.
- Treanor JJ, Campbell JD, Zangwill KM, Rowe T, Wolff M. Safety and immunogenicity of an inactivated subvirion influenza A (H5N1) vaccine. *N Engl J Med* 2006; 354: 1343-51.
